# Supplementary material for: GHGKHKNK Octapeptide (P-5m) Inhibits Metastasis of HCCLM3 Cell Lines via Regulation of MMP-2 Expression in in Vitro and in Vivo Studies
Source: Molecules. 2012 Feb 2;17(2):1357–72. doi: 10.3390/molecules17021357 (PMC6268966; doi:10.3390/molecules17021357)
Supplement: Supplementary File 1 [file molecules-17-01357-s001.pdf]

Correction

**Xiao Han, *et al.*, GHGKHKNK Octapeptide (P-5m) Inhibits Metastasis of HCCLM3 Cell Lines via Regulation of MMP-2 Expression in *in Vitro* and *in Vivo* Studies. *Molecules*, 2012, 17, 1357–1372**

Xiao Han <sup>1,2</sup>, Dong-Mei Yan <sup>1</sup>, Xiang-Feng Zhao <sup>1</sup>, Hiroshi Matsuura <sup>3</sup>, Wei-Guang Ding <sup>3</sup>, Peng Li <sup>1</sup>, Shuang Jiang <sup>2</sup>, Bai-Rong Du <sup>1</sup>, Pei-Ge Du <sup>2,†,\*</sup> and Xun Zhu <sup>1,†,\*</sup>

<sup>1</sup> Department of Immunology, Norman Bethune College of Medicine, Jilin University, Changchun 130021, China; E-Mails: hanxiaorumeng@126.com (X.H.); yxn345@sohu.com (D.-M.Y.); zxf184@163.com (X.-F.Z.); frank0414@163.com (P.L.); dubairong@yahoo.com.cn (B.-R.D.)

<sup>2</sup> Department of Microbial and Biochemical Pharmacy, College of Pharmaceutical Science, Beihua University, Jilin 132001, China; E-Mail: jiangshuang\_2000@163.com

<sup>3</sup> Department of Physiology, Shiga University of Medical Science, Shiga 520-2192, Japan; E-Mails: matuurah@belle.shiga-med.ac.jp (H.M.); ding@belle.shiga-med.ac.jp (W.-G.D.)

† These authors contributed equally to this work.

\* Authors to whom correspondence should be addressed; E-Mails: dupeige2001@126.com (P.-G.D.); zxunzhux@vip.sohu.com (X.Z.); Tel.: +86-431-8561-9476.

Received: 12 March 2012; in revised form: 12 March 2012 / Accepted: 14 March 2012 /

Published: 6 June 2012

---

The authors wish to make the following correction to this paper [1]: the correct name of the fourth author is Hiroshi Matsuura.

## Reference

1. Han, X.; Yan, D.-M.; Zhao, X.-F.; Hiroshi, M.; Ding, W.-G.; Li, P.; Jiang, S.; Du, B.-R.; Du, P.-G.; Zhu, X. GHGKHKNK Octapeptide (P-5m) Inhibits Metastasis of HCCLM3 Cell Lines via Regulation of MMP-2 Expression in *in Vitro* and *in Vivo* Studies. *Molecules* **2012**, *17*, 1357–1372.

© 2012 by the authors; licensee MDPI, Basel, Switzerland. This article is an open access article distributed under the terms and conditions of the Creative Commons Attribution license (<http://creativecommons.org/licenses/by/3.0/>).
